# Supplementary material
Source: publisher figshare collection journal article supplement (https://diabetesjournals.figshare.com/articles/dataset/_/12767927)
Supplement: Supplementary file 1 [file 1]

## Supplementary Table 1. Protocol of Physical Activity

Monitoring of physical activity: physical activity will be monitored using pedometers

Time: Physical activity will take place every day, from Thursday to Sunday

Frequency: Physical activity will take place 4 times a day.

Types of physical activity: Aerobic (morning warming-up, nordic walking, swimming, aqua aerobics, exercise with fitballs) and anaerobic exercise (bodybuilding during circuit training, and other group exercises/games)

Concept of physical activity:

|                    | Thursday                                 | Friday                                   | Saturday               | Sunday                                   |
|--------------------|------------------------------------------|------------------------------------------|------------------------|------------------------------------------|
| Morning            | Warm-up                                  | Warm-up                                  | Warm-up                | Warm-up                                  |
| Forenoon<br>(a.m.) | Exercise with fitballs                   | Aqua aerobics                            | Swimming               | Circuit training/<br>exercise with balls |
| Afternoon          | Circuit training/<br>exercise with balls | Nordic Walking                           | Nordic Walking         | Nordic Walking                           |
| Evening            | Swimming                                 | Circuit training/<br>exercise with balls | Exercise with fitballs | Aqua aerobics                            |

### Morning warm-up (duration of 30 minutes)

- 5-7 min. - running and jumping
- 15 min. - exercises for stretching of the upper and lower limbs, torso, back and buttocks
- 7-10 min. - collective games and competitions or dancing

### Circuit training (duration of 30 minutes)

- 10 min. - aerobic heating (jumps in place, warming up on an aerobic machine - bicycle, belt)
- 5 min. - exercises for stretching of the upper and lower limbs, torso, back and buttocks
- 35 min. - individual site - strengthening with their own weight (use of dumbbells, balls, bosu balls, rubber to stretching, etc.)
- 10 min. - exercises for stretching of the upper and lower limbs, trunk, back and buttocks

### Nordic Walking – (duration of 120 minutes)

- 10 min.- stretching the body, exercises with sticks
- 100 min. – Nordic Walking - walking speed 4 - 5 km per hour + necessary pauses
- 10 min. - exercises for stretching of the upper and lower limbs, torso, back and buttocks

### Swimming/ Aqua aerobics (duration of 50 minutes)

- 10 min. - heating in the water (exercises in water, ball games in water)
- 40 min. – swimming, exercise in the water with music
