# Supplementary material
Source: publisher figshare collection journal article supplement (https://diabetesjournals.figshare.com/articles/dataset/_/12767927)
Supplement: Supplementary file 2 [file 1]

## Supplementary Table 2:

Results of the WHOQOL-BREF questionnaire at the baseline and the end of the study

| Domain               | rtCGM    |                         |        | isCGM    |                         |        |
|----------------------|----------|-------------------------|--------|----------|-------------------------|--------|
|                      | baseline | at the end of the study | P      | baseline | at the end of the study | P      |
| Physical health      | 14.2±1.8 | 14.1±1.5                | 0.6821 | 13.9±1.6 | 14.0±1.7                | 0.8217 |
| Psychological health | 14.6±1.3 | 14.5±1.7                | 0.3336 | 14.6±1.6 | 14.7±1.6                | 0.8740 |
| Social relationships | 15.8±2.8 | 15.7±2.8                | 0.8794 | 15.4±3.4 | 15.2±2.8                | 0.5522 |
| Environment          | 15.3±2.0 | 15.5±2.1                | 0.5580 | 15.5±1.8 | 16.1±1.8                | 0.1017 |

Values are presented as mean ± SD; P values <0.05 are statistically significant.

Between-group differences in patient-reported quality of life measures

| Domain               | Baseline |          |        | At the end of the study |          |        |
|----------------------|----------|----------|--------|-------------------------|----------|--------|
|                      | rtCGM    | isCGM    | P      | rtCGM                   | isCGM    | P      |
| Physical health      | 14.2±1.8 | 13.9±1.6 | 0.5876 | 14.1±1.5                | 14.0±1.7 | 0.8418 |
| Psychological health | 14.6±1.3 | 14.6±1.6 | 0.9987 | 14.5±1.7                | 14.7±1.6 | 0.6469 |
| Social relationships | 15.8±2.8 | 15.4±3.4 | 0.6681 | 15.7±2.8                | 15.2±2.8 | 0.4232 |
| Environment          | 15.3±2.0 | 15.5±1.8 | 0.8176 | 15.5±2.1                | 16.1±1.8 | 0.2882 |

Values are presented as mean ± SD; P values <0.05 are statistically significant.
